# Supplementary material for: Mononuclear and binuclear manganese carbonyl hydrides: the preference for bridging hydrogens over bridging carbonyls
Source: Royal Society of Chemistry journal article supplement (doi:10.1039/b822913a), 2009-01-01
Supplement: b822913a.pdf [file b822913a.pdf]

# Mononuclear and Binuclear Manganese Carbonyl Hydrides: The Preference for Bridging Hydrogens over Bridging Carbonyls

Xian Mei Liu,<sup>a</sup> Qian-shu Li,<sup>\*a,b</sup> Yaoming Xie,<sup>c</sup>  
R. Bruce King,<sup>\*a,c</sup> and Henry F. Schaefer III<sup>c</sup>

<sup>a</sup>Center for Computational Quantum Chemistry, South China Normal University,  
Guangzhou 510631, P. R. China

<sup>b</sup>Institute of Chemical Physics, Beijing Institute of Technology, Beijing 100081, P. R.  
China

<sup>c</sup>Department of Chemistry and Center for Computational Chemistry, University of  
Georgia, Athens, Georgia 30602, USA

## Supporting Information

**Tables S1 to S5:** Harmonic vibrational frequencies and infrared intensities for  $\text{HMn}(\text{CO})_n$  ( $n = 5, 4, 3$ ).

**Tables S6 to S12:** Harmonic vibrational frequencies and infrared intensities for  $\text{H}_2\text{Mn}_2(\text{CO})_n$  ( $n = 9, 8, 7, 6$ ).

**Tables S13 to S20:** Atomic coordinates of the optimized structures  $\text{HMn}(\text{CO})_n$  ( $n = 5, 4, 3$ ).

**Tables S21 to S35:** Atomic coordinates of the optimized structures  $\text{H}_2\text{Mn}_2(\text{CO})_n$  ( $n = 9, 8, 7, 6$ ).

Complete Gaussian 03 reference (Reference 40)

**Table S1.** Harmonic vibrational frequencies(in  $\text{cm}^{-1}$ ) and Infrared Intensities ( in Parentheses in  $\text{km/mol}$  ) for **15-1**.

| -              | <b>15-1</b> |            |
|----------------|-------------|------------|
|                | B3LYP       | BP86       |
| b <sub>2</sub> | 44(0)       | 33(0)      |
| e              | 79(0)       | 75(0)      |
| e              | 79(0)       | 75(0)      |
| b <sub>1</sub> | 98(0)       | 94(0)      |
| e              | 103(0)      | 99(0)      |
| e              | 103(0)      | 99(0)      |
| a <sub>1</sub> | 111(0)      | 106(0)     |
| e              | 353(2)      | 349(0)     |
| e              | 353(2)      | 349(0)     |
| a <sub>2</sub> | 371(0)      | 375(0)     |
| a <sub>1</sub> | 406(0)      | 478(0)     |
| b <sub>2</sub> | 417(0)      | 440(0)     |
| a <sub>1</sub> | 459(5)      | 476(2)     |
| e              | 467(26)     | 483(12)    |
| e              | 467(26)     | 483(12)    |
| b <sub>2</sub> | 507(0)      | 491(0)     |
| e              | 550(1)      | 537(0)     |
| e              | 550(1)      | 537(0)     |
| b <sub>1</sub> | 574(0)      | 560(0)     |
| e              | 634(64)     | 611(23)    |
| e              | 634(64)     | 611(23)    |
| a <sub>1</sub> | 685(149)    | 685(132)   |
| e              | 771(138)    | 752(180)   |
| e              | 771(138)    | 752(180)   |
| a <sub>1</sub> | 1846(17)    | 1839(0)    |
| a <sub>1</sub> | 2077(892)   | 1998(779)  |
| e              | 2085(1557)  | 2001(1397) |
| e              | 2085(1558)  | 2001(1397) |
| b <sub>2</sub> | 2101(0)     | 2022(0)    |
| a <sub>1</sub> | 2173(6)     | 2093(2)    |

**Table S2.** Harmonic vibrational frequencies(in  $\text{cm}^{-1}$ ) and Infrared Intensities ( in Parentheses in  $\text{km/mol}$  ) for **14-1** and **14-2**.

| -   | 14-1       |            | -              | 14-2       |            |
|-----|------------|------------|----------------|------------|------------|
|     | B3LYP      | BP86       |                | B3LYP      | BP86       |
| a'  | 69(0)      | 65(0)      | b <sub>2</sub> | 30(0)      | 22(0)      |
| a'' | 81(0)      | 79(0)      | e              | 90(1)      | 84(1)      |
| a'  | 91(0)      | 87(0)      | e              | 90(1)      | 84(1)      |
| a'' | 100(1)     | 98(1)      | b <sub>1</sub> | 95(0)      | 93(0)      |
| a'  | 102(0)     | 99(0)      | a <sub>1</sub> | 111(0)     | 105(0)     |
| a'  | 314(10)    | 311(7)     | e              | 342(4)     | 336(1)     |
| a'' | 354(5)     | 349(2)     | e              | 342(4)     | 336(1)     |
| a'' | 358(0)     | 363(0)     | a <sub>2</sub> | 367(0)     | 371(0)     |
| a'  | 408(2)     | 428(0)     | a <sub>1</sub> | 415(1)     | 439(0)     |
| a'  | 449(7)     | 468(3)     | b <sub>2</sub> | 417(0)     | 440(0)     |
| a'' | 451(39)    | 467(20)    | e              | 464(56)    | 481(29)    |
| a'  | 480(6)     | 512(0)     | e              | 464(56)    | 481(29)    |
| a'  | 532(4)     | 521(3)     | b <sub>2</sub> | 503(0)     | 497(0)     |
| a'' | 554(11)    | 541(8)     | b <sub>1</sub> | 578(0)     | 564(0)     |
| a'  | 570(28)    | 574(17)    | e              | 633(77)    | 621(52)    |
| a'  | 621(80)    | 624(63)    | e              | 633(77)    | 621(52)    |
| a'' | 625(36)    | 607(9)     | a <sub>1</sub> | 669(58)    | 670(46)    |
| a'  | 703(57)    | 713(61)    | e              | 808(15)    | 801(45)    |
| a'' | 756(47)    | 722(73)    | e              | 808(15)    | 801(45)    |
| a'  | 1835(47)   | 1828(15)   | a <sub>1</sub> | 1924(63)   | 1968(21)   |
| a'  | 2054(942)  | 1966(787)  | e              | 2053(1957) | 1964(1690) |
| a'  | 2068(751)  | 1978(1448) | e              | 2053(1957) | 1964(1690) |
| a'' | 2069(1674) | 1983(661)  | b <sub>2</sub> | 2079(0)    | 1998(0)    |
| a'  | 2147(28)   | 2060(22)   | a <sub>1</sub> | 2152(3)    | 2066(2)    |

**Table S3.** Harmonic vibrational frequencies(in  $\text{cm}^{-1}$ ) and Infrared Intensities ( in Parentheses in  $\text{km/mol}$  ) for **14-3T**.

|                | <b>14-3T</b> |            |
|----------------|--------------|------------|
|                | B3LYP        | BP86       |
| a <sub>1</sub> | 46(0)        | 51(0)      |
| b <sub>2</sub> | 54(2)        | 13i(3)     |
| a <sub>2</sub> | 68(0)        | 71(0)      |
| b <sub>1</sub> | 91(0)        | 88(0)      |
| a <sub>1</sub> | 96(0)        | 91(0)      |
| b <sub>1</sub> | 209(4)       | 280(1)     |
| b <sub>1</sub> | 302(1)       | 385(0)     |
| a <sub>1</sub> | 334(9)       | 382(4)     |
| a <sub>2</sub> | 335(0)       | 344(0)     |
| b <sub>2</sub> | 346(0)       | 355(1)     |
| a <sub>1</sub> | 370(0)       | 402(1)     |
| b <sub>2</sub> | 386(37)      | 333(17)    |
| b <sub>1</sub> | 408(10)      | 453(1)     |
| a <sub>1</sub> | 438(3)       | 463(2)     |
| a <sub>2</sub> | 498(0)       | 503(0)     |
| b <sub>2</sub> | 537(61)      | 562(44)    |
| a <sub>1</sub> | 591(73)      | 586(61)    |
| b <sub>1</sub> | 592(59)      | 608(69)    |
| b <sub>2</sub> | 670(1)       | 603(0)     |
| a <sub>1</sub> | 1801(112)    | 1835(39)   |
| b <sub>2</sub> | 2051(1930)   | 1968(1544) |
| a <sub>1</sub> | 2071(515)    | 1974(495)  |
| b <sub>1</sub> | 2088(1032)   | 1985(872)  |
| a <sub>1</sub> | 2145(46)     | 2046(51)   |

**Table S4.** Harmonic vibrational frequencies(in  $\text{cm}^{-1}$ ) and Infrared Intensities ( in Parentheses in  $\text{km/mol}$  ) for **13-1** and **13-2**.

|     | <b>13-1</b> |           |     | <b>13-2</b> |            |
|-----|-------------|-----------|-----|-------------|------------|
|     | B3LYP       | BP86      |     | B3LYP       | BP86       |
| a'' | 82(0)       | 78(0)     | a'  | 73(1)       | 70(1)      |
| a'  | 91(0)       | 91(0)     | a'  | 91(0)       | 91(1)      |
| a'  | 105(1)      | 105(1)    | a'' | 96(1)       | 96(1)      |
| a'' | 305(12)     | 289(6)    | a'  | 337(18)     | 344(3)     |
| a'  | 318(35)     | 325(30)   | a'' | 347(8)      | 352(11)    |
| a'' | 379(2)      | 397(2)    | a'' | 360(0)      | 366(0)     |
| a'  | 438(11)     | 458(9)    | a'  | 428(1)      | 455(1)     |
| a'  | 476(14)     | 501(1)    | a'' | 463(76)     | 482(38)    |
| a'' | 497(22)     | 524(4)    | a'  | 488(9)      | 525(0)     |
| a'' | 526(10)     | 541(11)   | a'  | 577(16)     | 579(10)    |
| a'  | 584(67)     | 589(46)   | a'  | 604(49)     | 612(28)    |
| a'  | 626(34)     | 645(28)   | a'' | 626(27)     | 622(20)    |
| a'' | 706(13)     | 709(17)   | a'  | 713(17)     | 760(16)    |
| a'  | 732(47)     | 745(60)   | a'' | 798(1)      | 777(12)    |
| a'  | 1841(139)   | 1823(57)  | a'  | 1923(104)   | 1933(645)  |
| a'' | 2037(1046)  | 1943(861) | a'  | 2023(816)   | 1973(28)   |
| a'  | 2042(1161)  | 1950(959) | a'' | 2033(2059)  | 1937(1684) |
| a'  | 2112(275)   | 2021(208) | a'  | 2119(26)    | 2027(23)   |

**Table S5.** Harmonic vibrational frequencies(in  $\text{cm}^{-1}$ ) and Infrared Intensities ( in Parentheses in  $\text{km/mol}$  ) for **13-3T** and **13-4**.

|                | <b>13-3T</b> |            |                | <b>13-4</b> |            |
|----------------|--------------|------------|----------------|-------------|------------|
|                | B3LYP        | BP86       |                | B3LYP       | BP86       |
| b <sub>2</sub> | 43(0)        | 10(0)      | b <sub>2</sub> | 80(0)       | 79(0)      |
| b <sub>1</sub> | 81(3)        | 59(7)      | a <sub>1</sub> | 82(0)       | 75(0)      |
| a <sub>1</sub> | 92(0)        | 88(0)      | b <sub>1</sub> | 93(1)       | 90(1)      |
| b <sub>1</sub> | 228(26)      | 184(21)    | b <sub>1</sub> | 255(9)      | 252(3)     |
| a <sub>2</sub> | 320(0)       | 315(0)     | a <sub>2</sub> | 321(0)      | 315(0)     |
| b <sub>2</sub> | 326(11)      | 316(5)     | b <sub>2</sub> | 349(8)      | 345(3)     |
| b <sub>1</sub> | 366(19)      | 317(7)     | a <sub>1</sub> | 412(0)      | 430(0)     |
| a <sub>1</sub> | 375(5)       | 397(2)     | a <sub>1</sub> | 461(9)      | 480(2)     |
| a <sub>1</sub> | 431(3)       | 451(2)     | b <sub>2</sub> | 462(56)     | 474(32)    |
| b <sub>2</sub> | 457(53)      | 454(2)     | b <sub>1</sub> | 551(15)     | 566(8)     |
| b <sub>2</sub> | 487(55)      | 474(56)    | b <sub>2</sub> | 575(48)     | 563(26)    |
| b <sub>1</sub> | 561(7)       | 558(3)     | a <sub>1</sub> | 599(75)     | 586(49)    |
| a <sub>1</sub> | 599(90)      | 592(75)    | b <sub>1</sub> | 662(2)      | 686(5)     |
| b <sub>2</sub> | 742(36)      | 708(52)    | b <sub>2</sub> | 752(39)     | 713(56)    |
| a <sub>1</sub> | 1802(51)     | 1804(13)   | a <sub>1</sub> | 1798(60)    | 1797(8)    |
| b <sub>2</sub> | 2026(2267)   | 1945(1854) | a <sub>1</sub> | 2047(1028)  | 1960(891)  |
| a <sub>1</sub> | 2071(686)    | 1989(632)  | b <sub>2</sub> | 2052(1840)  | 1957(1625) |
| a <sub>1</sub> | 2141(176)    | 2050(102)  | a <sub>1</sub> | 2131(18)    | 2039(5)    |

**Table S6.** Harmonic vibrational frequencies(in  $\text{cm}^{-1}$ ) and Infrared Intensities ( in Parentheses in  $\text{km/mol}$  ) for **29-1** and **29-2** .

| -   | 29-1    |         | - | 29-2    |         |
|-----|---------|---------|---|---------|---------|
|     | B3LYP   | BP86    |   | B3LYP   | BP86    |
| a'' | 36(0)   | 36(0)   | a | 16(0)   | 14(0)   |
| a'' | 53(0)   | 50(0)   | a | 22(0)   | 29(0)   |
| a'  | 54(0)   | 51(0)   | a | 37(0)   | 40(0)   |
| a'  | 60(0)   | 53(0)   | a | 52(1)   | 54(0)   |
| a'' | 63(0)   | 60(0)   | a | 64(0)   | 62(0)   |
| a'' | 69(0)   | 60(0)   | a | 72(0)   | 73(0)   |
| a'  | 80(0)   | 73(0)   | a | 73(0)   | 76(0)   |
| a'  | 86(0)   | 81(0)   | a | 77(1)   | 81(0)   |
| a'' | 87(0)   | 83(0)   | a | 82(0)   | 84(0)   |
| a'  | 96(0)   | 93(0)   | a | 85(0)   | 86(1)   |
| a'  | 98(0)   | 94(0)   | a | 87(0)   | 90(2)   |
| a'' | 98(0)   | 95(0)   | a | 96(0)   | 94(0)   |
| a'  | 104(1)  | 100(1)  | a | 101(0)  | 101(0)  |
| a'' | 105(1)  | 102(1)  | a | 103(0)  | 104(0)  |
| a'  | 108(0)  | 104(0)  | a | 107(1)  | 107(1)  |
| a'' | 108(0)  | 104(0)  | a | 110(1)  | 115(1)  |
| a'  | 116(2)  | 113(2)  | a | 112(1)  | 116(7)  |
| a'  | 150(0)  | 153(0)  | a | 131(0)  | 142(1)  |
| a'' | 343(1)  | 346(1)  | a | 299(1)  | 297(2)  |
| a'  | 368(12) | 363(19) | a | 357(3)  | 348(3)  |
| a'' | 371(0)  | 373(0)  | a | 360(1)  | 367(0)  |
| a'' | 397(0)  | 396(0)  | a | 369(12) | 392(12) |
| a'' | 413(0)  | 410(0)  | a | 387(1)  | 408(6)  |
| a'  | 399(24) | 416(6)  | a | 396(0)  | 417(1)  |
| a'  | 406(1)  | 424(6)  | a | 410(4)  | 421(0)  |
| a'  | 419(1)  | 427(0)  | a | 413(1)  | 427(2)  |
| a'' | 417(0)  | 431(0)  | a | 421(1)  | 437(1)  |
| a'' | 452(13) | 459(4)  | a | 440(20) | 462(10) |
| a'  | 459(9)  | 460(12) | a | 443(25) | 469(16) |
| a'' | 468(19) | 461(2)  | a | 452(2)  | 478(1)  |
| a'' | 472(0)  | 480(10) | a | 469(4)  | 482(1)  |
| a'  | 470(18) | 481(9)  | a | 478(22) | 486(4)  |
| a'  | 476(2)  | 487(3)  | a | 486(5)  | 492(9)  |
| a'' | 487(5)  | 492(7)  | a | 510(0)  | 498(2)  |
| a'  | 480(4)  | 493(1)  | a | 534(0)  | 509(3)  |
| a'  | 491(0)  | 506(1)  | a | 548(3)  | 538(3)  |
| a'  | 555(1)  | 542(0)  | a | 550(3)  | 543(1)  |
| a'  | 560(0)  | 545(0)  | a | 557(0)  | 546(4)  |
| a'' | 558(0)  | 547(0)  | a | 562(6)  | 548(1)  |

|     |            |            |   |            |            |
|-----|------------|------------|---|------------|------------|
| a'  | 572(5)     | 564(6)     | a | 592(0)     | 572(8)     |
| a'' | 580(1)     | 573(1)     | a | 603(30)    | 579(3)     |
| a'' | 610(7)     | 599(3)     | a | 629(41)    | 607(16)    |
| a'  | 659(332)   | 662(124)   | a | 646(52)    | 653(163)   |
| a'  | 664(423)   | 664(176)   | a | 658(217)   | 660(103)   |
| a'' | 666(67)    | 664(64)    | a | 672(156)   | 674(109)   |
| a'  | 668(129)   | 670(427)   | a | 680(130)   | 678(224)   |
| a'' | 682(136)   | 680(125)   | a | 738(46)    | 712(109)   |
| a'  | 694(3)     | 696(8)     | a | 758(127)   | 749(155)   |
| a'  | 1031(33)   | 1091(31)   | a | 773(80)    | 997(93)    |
| a'  | 1658(50)   | 1709(54)   | a | 1784(533)  | 1491(67)   |
| a'' | 2044(3)    | 1962(13)   | a | 1824(74)   | 1823(1)    |
| a'  | 2048(153)  | 1970(211)  | a | 2039(767)  | 1963(600)  |
| a'  | 2056(656)  | 1978(834)  | a | 2041(914)  | 1970(490)  |
| a'  | 2065(59)   | 1987(46)   | a | 2052(678)  | 1980(454)  |
| a'  | 2073(1617) | 1993(1306) | a | 2092(865)  | 2003(485)  |
| a'' | 2073(368)  | 1994(1826) | a | 2114(1365) | 2013(1367) |
| a'' | 2081(2167) | 2002(374)  | a | 2116(1530) | 2020(1560) |
| a'  | 2090(2130) | 2027(1271) | a | 2124(225)  | 2036(13)   |
| a'  | 2162(43)   | 2081(38)   | a | 2132(69)   | 2042(650)  |
| a'  | 3210(159)  | 2847(114)  | a | 2192(42)   | 2100(84)   |

**Table S7.** Harmonic vibrational frequencies(in  $\text{cm}^{-1}$ ) and Infrared Intensities ( in Parentheses in  $\text{km/mol}$  ) for **28-1** .

| -               | <b>28-1</b> |        |
|-----------------|-------------|--------|
|                 | B3LYP       | BP86   |
| a <sub>u</sub>  | 19(0)       | 18(0)  |
| b <sub>1u</sub> | 37(0)       | 32(0)  |
| b <sub>2g</sub> | 49(0)       | 44(0)  |
| b <sub>3u</sub> | 69(0)       | 66(0)  |
| b <sub>1g</sub> | 78(0)       | 74(0)  |
| a <sub>g</sub>  | 79(0)       | 79(0)  |
| b <sub>2u</sub> | 88(1)       | 81(1)  |
| a <sub>u</sub>  | 90(0)       | 88(0)  |
| b <sub>3g</sub> | 91(0)       | 88(0)  |
| b <sub>1u</sub> | 93(0)       | 88(0)  |
| b <sub>3u</sub> | 109(0)      | 107(0) |
| b <sub>1g</sub> | 117(0)      | 113(0) |
| b <sub>2g</sub> | 122(0)      | 117(0) |
| a <sub>g</sub>  | 127(0)      | 118(0) |
| b <sub>2u</sub> | 128(0)      | 120(0) |
| a <sub>g</sub>  | 196(0)      | 193(0) |
| b <sub>3g</sub> | 358(0)      | 359(0) |
| b <sub>2u</sub> | 379(0)      | 353(1) |



|                 |            |            |
|-----------------|------------|------------|
| b <sub>3u</sub> | 390(0)     | 418(3)     |
| a <sub>g</sub>  | 399(0)     | 424(0)     |
| a <sub>u</sub>  | 405(0)     | 407(0)     |
| b <sub>1g</sub> | 411(0)     | 418(0)     |
| b <sub>1u</sub> | 429(4)     | 426(3)     |
| b <sub>2g</sub> | 449(0)     | 448(0)     |
| b <sub>2u</sub> | 453(82)    | 471(41)    |
| b <sub>3u</sub> | 454(4)     | 481(4)     |
| a <sub>g</sub>  | 463(0)     | 488(0)     |
| b <sub>1g</sub> | 471(0)     | 491(0)     |
| b <sub>2g</sub> | 472(0)     | 491(0)     |
| b <sub>1u</sub> | 473(30)    | 496(11)    |
| b <sub>3u</sub> | 547(2)     | 541(0)     |
| a <sub>g</sub>  | 565(0)     | 558(0)     |
| a <sub>u</sub>  | 580(0)     | 570(0)     |
| b <sub>3g</sub> | 581(0)     | 569(0)     |
| b <sub>1u</sub> | 631(128)   | 633(104)   |
| b <sub>2u</sub> | 632(50)    | 613(1)     |
| b <sub>1g</sub> | 643(0)     | 643(0)     |
| b <sub>2g</sub> | 646(0)     | 652(0)     |
| b <sub>3u</sub> | 678(337)   | 684(273)   |
| b <sub>3g</sub> | 685(0)     | 586(0)     |
| a <sub>g</sub>  | 695(0)     | 698(0)     |
| b <sub>2u</sub> | 731(151)   | 664(192)   |
| b <sub>1u</sub> | 1250(4)    | 1240(6)    |
| b <sub>2g</sub> | 1270(0)    | 1274(0)    |
| b <sub>3u</sub> | 1327(1523) | 1326(950)  |
| a <sub>g</sub>  | 1338(0)    | 1317(0)    |
| b <sub>1g</sub> | 2058(0)    | 1967(0)    |
| b <sub>2g</sub> | 2060(0)    | 1977(0)    |
| b <sub>1u</sub> | 2064(1958) | 1980(1683) |
| b <sub>3u</sub> | 2073(813)  | 1989(627)  |
| a <sub>g</sub>  | 2084(0)    | 1999(0)    |
| b <sub>2u</sub> | 2091(2515) | 2000(2226) |
| b <sub>3u</sub> | 2133(721)  | 2054(666)  |
| a <sub>g</sub>  | 2166(0)    | 2082(0)    |

---

**Table S8.** Harmonic vibrational frequencies(in  $\text{cm}^{-1}$ ) and Infrared Intensities ( in Parentheses in  $\text{km/mol}$  ) for **27-1** , **27-2** and **27-5**.

| -   | 27-1      |           | -   | 27-2      |          | -   | 27-5      |           |
|-----|-----------|-----------|-----|-----------|----------|-----|-----------|-----------|
|     | B3LYP     | BP86      |     | B3LYP     | BP86     |     | B3LYP     | BP86      |
| a'' | 28(0)     | 20(0)     | a'' | 54i(0)    | 71i(0)   | a'' | 23(0)     | 19(0)     |
| a'  | 32(1)     | 30(0)     | a'' | 30(0)     | 14(0)    | a'  | 43(0)     | 37(0)     |
| a'' | 42(0)     | 39(0)     | a'  | 45(0)     | 41(0)    | a'  | 49(0)     | 47(0)     |
| a'' | 70(0)     | 66(0)     | a'' | 58(0)     | 48(0)    | a'  | 70(0)     | 67(0)     |
| a'  | 72(0)     | 69(0)     | a'  | 72(0)     | 69(0)    | a'' | 75(0)     | 70(0)     |
| a'  | 82(0)     | 82(0)     | a'  | 76(0)     | 73(1)    | a'' | 87(1)     | 82(0)     |
| a'  | 87(0)     | 88(0)     | a'  | 83(0)     | 81(0)    | a'' | 90(0)     | 87(0)     |
| a'' | 87(0)     | 85(0)     | a'' | 86(0)     | 84(0)    | a'  | 90(0)     | 86(0)     |
| a'' | 93(0)     | 92(0)     | a'' | 89(0)     | 89(0)    | a'  | 98(0)     | 95(0)     |
| a'  | 100(1)    | 102(0)    | a'  | 94(0)     | 92(0)    | a'' | 108(0)    | 103(0)    |
| a'  | 111(0)    | 113(0)    | a'' | 100(0)    | 98(0)    | a'  | 120(0)    | 112(0)    |
| a'  | 124(1)    | 148(0)    | a'  | 111(0)    | 109(0)   | a'' | 121(0)    | 115(0)    |
| a'' | 131(0)    | 131(0)    | a'  | 132(0)    | 130(0)   | a'  | 124(0)    | 122(0)    |
| a'  | 203(4)    | 211(0)    | a'  | 202(5)    | 208(4)   | a'  | 205(0)    | 201(0)    |
| a'' | 356(0)    | 355(0)    | a'' | 310(1)    | 311(0)   | a'' | 333(0)    | 325(0)    |
| a'  | 358(0)    | 352(7)    | a'' | 355(0)    | 351(0)   | a'' | 371(0)    | 354(0)    |
| a'  | 401(3)    | 417(1)    | a'' | 382(0)    | 395(0)   | a'  | 384(9)    | 416(6)    |
| a'' | 411(0)    | 418(0)    | a'  | 407(6)    | 429(4)   | a'' | 392(9)    | 394(2)    |
| a'' | 428(2)    | 424(2)    | a'' | 427(1)    | 429(0)   | a'  | 397(0)    | 423(0)    |
| a'  | 435(1)    | 447(0)    | a'  | 432(2)    | 432(1)   | a'' | 407(2)    | 412(0)    |
| a'  | 446(11)   | 461(20)   | a'  | 445(4)    | 456(0)   | a'  | 437(5)    | 431(4)    |
| a'' | 450(0)    | 458(0)    | a'  | 449(3)    | 468(1)   | a'' | 443(107)  | 461(62)   |
| a'  | 454(18)   | 467(2)    | a'  | 461(1)    | 489(4)   | a'  | 459(3)    | 476(3)    |
| a'  | 469(16)   | 497(9)    | a'' | 467(33)   | 478(14)  | a'' | 466(0)    | 484(0)    |
| a'' | 472(25)   | 487(2)    | a'  | 473(26)   | 496(2)   | a'  | 467(11)   | 485(2)    |
| a'' | 501(20)   | 518(19)   | a'  | 502(21)   | 525(14)  | a'  | 474(2)    | 494(3)    |
| a'  | 503(17)   | 511(8)    | a'' | 503(13)   | 531(6)   | a'  | 481(11)   | 509(1)    |
| a'  | 537(2)    | 528(10)   | a'  | 547(3)    | 534(16)  | a'  | 556(0)    | 548(0)    |
| a'' | 566(0)    | 547(0)    | a'' | 563(0)    | 549(0)   | a'' | 580(0)    | 568(0)    |
| a'' | 604(49)   | 571(0)    | a'' | 613(49)   | 594(14)  | a'  | 605(39)   | 614(30)   |
| a'  | 616(76)   | 612(52)   | a'  | 619(64)   | 619(64)  | a'' | 617(21)   | 586(3)    |
| a'  | 632(6)    | 639(13)   | a'' | 620(3)    | 619(1)   | a'  | 629(64)   | 633(50)   |
| a'' | 637(0)    | 629(63)   | a'  | 639(44)   | 642(25)  | a'' | 638(18)   | 606(4)    |
| a'  | 656(239)  | 650(196)  | a'  | 667(237)  | 664(201) | a'  | 644(57)   | 648(29)   |
| a'' | 678(38)   | 651(17)   | a'' | 675(7)    | 633(16)  | a'' | 685(19)   | 641(13)   |
| a'  | 686(1)    | 692(4)    | a'  | 688(3)    | 696(2)   | a'  | 685(138)  | 688(105)  |
| a'  | 754(77)   | 718(72)   | a'' | 732(92)   | 702(113) | a'' | 742(83)   | 668(116)  |
| a'' | 1252(6)   | 1177(8)   | a'  | 1301(60)  | 1264(6)  | a'  | 1216(18)  | 1110(86)  |
| a'  | 1306(470) | 1221(158) | a'  | 1358(305) | 1299(92) | a'  | 1231(478) | 1201(155) |

|     |            |            |     |            |            |     |            |            |
|-----|------------|------------|-----|------------|------------|-----|------------|------------|
| a'' | 1487(0)    | 1497(2)    | a'  | 1454(2)    | 1464(3)    | a'  | 1316(504)  | 1327(220)  |
| a'  | 1513(31)   | 1520(4)    | a'  | 1491(66)   | 1483(6)    | a'  | 1391(378)  | 1499(242)  |
| a'  | 2044(309)  | 1958(203)  | a'' | 2044(296)  | 1954(333)  | a'' | 2036(339)  | 1934(508)  |
| a'' | 2051(773)  | 1962(663)  | a'  | 2053(737)  | 1961(693)  | a'  | 2043(780)  | 1954(576)  |
| a'  | 2064(1366) | 1972(1189) | a'  | 2072(1104) | 1989(894)  | a'  | 2059(1080) | 1976(884)  |
| a'' | 2075(1115) | 1992(964)  | a'' | 2078(1969) | 1995(1617) | a'  | 2076(329)  | 1990(1898) |
| a'  | 2096(1186) | 2012(791)  | a'  | 2084(510)  | 2005(357)  | a'' | 2082(2439) | 1993(274)  |
| a'  | 2108(847)  | 2022(922)  | a'  | 2104(1142) | 2018(1044) | a'  | 2117(566)  | 2025(552)  |
| a'  | 2157(133)  | 2071(201)  | a'  | 2154(68)   | 2068(135)  | a   | 2157(52)   | 2072(95)   |

---

**Table S9.** Harmonic vibrational frequencies(in  $\text{cm}^{-1}$ ) and Infrared Intensities ( in Parentheses in  $\text{km/mol}$  ) for **27-3T** and **27-4T**.

|     | <b>27-3T</b> |           |                | <b>27-4T</b> |           |
|-----|--------------|-----------|----------------|--------------|-----------|
|     | B3LYP        | BP86      |                | B3LYP        | BP86      |
| a'' | 19(0)        | 18(0)     | a <sub>2</sub> | 16(0)        | 9(0)      |
| a'  | 42(0)        | 38(0)     | b <sub>1</sub> | 25(0)        | 28(0)     |
| a'' | 47(0)        | 36(0)     | b <sub>1</sub> | 43(0)        | 39(0)     |
| a'  | 51(0)        | 56(0)     | b <sub>2</sub> | 60(2)        | 54(1)     |
| a'' | 69(1)        | 69(0)     | a <sub>1</sub> | 71(0)        | 69(0)     |
| a'  | 70(0)        | 71(0)     | b <sub>2</sub> | 78(0)        | 74(0)     |
| a'  | 76(0)        | 74(0)     | a <sub>2</sub> | 91(0)        | 88(0)     |
| a'  | 77(0)        | 75(0)     | b <sub>1</sub> | 93(1)        | 88(0)     |
| a'' | 86(0)        | 84(0)     | a <sub>1</sub> | 101(0)       | 98(0)     |
| a'' | 93(1)        | 88(1)     | b <sub>2</sub> | 103(0)       | 96(0)     |
| a'  | 101(0)       | 99(0)     | b <sub>1</sub> | 118(1)       | 116(1)    |
| a'' | 106(0)       | 102(0)    | b <sub>2</sub> | 126(0)       | 118(0)    |
| a'  | 122(0)       | 120(0)    | a <sub>1</sub> | 129(0)       | 121(0)    |
| a'  | 197(4)       | 198(5)    | a <sub>1</sub> | 187(9)       | 188(5)    |
| a'' | 297(2)       | 310(0)    | b <sub>1</sub> | 329(1)       | 338(1)    |
| a'' | 335(0)       | 325(1)    | a <sub>2</sub> | 337(0)       | 335(0)    |
| a'' | 344(2)       | 354(0)    | b <sub>2</sub> | 367(0)       | 347(0)    |
| a'  | 344(13)      | 401(7)    | a <sub>1</sub> | 389(4)       | 417(2)    |
| a'  | 370(4)       | 406(4)    | a <sub>2</sub> | 392(0)       | 389(0)    |
| a'' | 374(12)      | 388(0)    | b <sub>2</sub> | 399(11)      | 404(3)    |
| a'' | 399(10)      | 437(17)   | a <sub>1</sub> | 402(3)       | 426(1)    |
| a'  | 406(3)       | 426(4)    | a <sub>1</sub> | 409(15)      | 444(8)    |
| a'  | 409(6)       | 428(1)    | b <sub>2</sub> | 442(86)      | 456(41)   |
| a'  | 446(0)       | 447(1)    | b <sub>1</sub> | 444(3)       | 438(2)    |
| a'  | 455(4)       | 476(0)    | a <sub>1</sub> | 464(3)       | 483(1)    |
| a'' | 459(32)      | 470(14)   | b <sub>2</sub> | 469(18)      | 489(7)    |
| a'  | 474(22)      | 490(4)    | b <sub>1</sub> | 477(16)      | 492(6)    |
| a'  | 486(14)      | 520(22)   | b <sub>2</sub> | 532(12)      | 535(20)   |
| a'  | 534(25)      | 539(5)    | a <sub>1</sub> | 548(3)       | 539(2)    |
| a'  | 553(1)       | 555(24)   | b <sub>1</sub> | 583(14)      | 587(14)   |
| a'' | 568(1)       | 553(0)    | a <sub>2</sub> | 585(0)       | 567(0)    |
| a'' | 570(6)       | 577(3)    | a <sub>1</sub> | 628(75)      | 630(65)   |
| a'' | 616(14)      | 584(7)    | b <sub>2</sub> | 632(20)      | 612(0)    |
| a'  | 639(69)      | 639(56)   | b <sub>1</sub> | 643(85)      | 645(63)   |
| a'' | 644(18)      | 607(0)    | a <sub>2</sub> | 683(0)       | 593(0)    |
| a'  | 674(191)     | 671(149)  | a <sub>1</sub> | 687(174)     | 687(130)  |
| a'' | 720(98)      | 674(111)  | b <sub>2</sub> | 725(106)     | 662(120)  |
| a'  | 1247(95)     | 1244(27)  | b <sub>1</sub> | 1038(4)      | 1093(1)   |
| a'  | 1328(475)    | 1294(273) | a <sub>1</sub> | 1150(433)    | 1158(281) |

|     |            |            |                |            |            |
|-----|------------|------------|----------------|------------|------------|
| a'  | 1381(8)    | 1379(8)    | b <sub>1</sub> | 1380(8)    | 1359(1)    |
| a'  | 1435(286)  | 1415(60)   | a <sub>1</sub> | 1418(1028) | 1399(587)  |
| a'  | 2038(775)  | 1953(545)  | b <sub>2</sub> | 2029(266)  | 1941(289)  |
| a'' | 2062(225)  | 1964(167)  | b <sub>1</sub> | 2053(1052) | 1974(900)  |
| a'  | 2063(1046) | 1981(883)  | a <sub>1</sub> | 2066(703)  | 1982(794)  |
| a'  | 2077(498)  | 1991(1960) | b <sub>2</sub> | 2074(2740) | 1985(2228) |
| a'' | 2087(2204) | 1998(420)  | a <sub>1</sub> | 2080(158)  | 1991(0)    |
| a'  | 2115(915)  | 2012(928)  | a <sub>1</sub> | 2120(1042) | 2033(900)  |
| a'  | 2154(18)   | 2067(116)  | a <sub>1</sub> | 2157(1)    | 2070(32)   |

**Table S10.** Harmonic vibrational frequencies(in cm<sup>-1</sup>) and Infrared Intensities ( in Parentheses in km/mol ) for **26-1** and **26-2** .

| -   | <b>26-1</b> |            | -              | <b>26-2</b> |         |
|-----|-------------|------------|----------------|-------------|---------|
|     | B3LYP       | BP86       |                | B3LYP       | BP86    |
| a'  | 11(3)       | 34(0)      | b <sub>u</sub> | 3(2)        | 27i(3)  |
| a'' | 36(0)       | 34(2)      | a <sub>u</sub> | 35(0)       | 35(0)   |
| a'' | 50(0)       | 44(0)      | a <sub>u</sub> | 50(0)       | 46(0)   |
| a'  | 79(0)       | 77(0)      | a <sub>g</sub> | 79(0)       | 77(0)   |
| a'' | 79(0)       | 78(0)      | b <sub>g</sub> | 80(0)       | 78(0)   |
| a'  | 81(0)       | 81(0)      | a <sub>g</sub> | 81(0)       | 79(0)   |
| a'  | 86(0)       | 87(1)      | b <sub>u</sub> | 86(0)       | 83(0)   |
| a'' | 92(1)       | 90(1)      | a <sub>u</sub> | 92(1)       | 91(1)   |
| a'  | 107(0)      | 105(0)     | b <sub>u</sub> | 107(0)      | 106(0)  |
| a'  | 122(0)      | 119(0)     | a <sub>g</sub> | 122(0)      | 121(0)  |
| a'' | 125(0)      | 124(0)     | b <sub>g</sub> | 125(0)      | 122(0)  |
| a'  | 204(0)      | 218(1)     | a <sub>g</sub> | 204(0)      | 208(0)  |
| a'  | 345(22)     | 379(14)    | b <sub>u</sub> | 344(21)     | 337(11) |
| a'' | 354(0)      | 356(0)     | b <sub>g</sub> | 352(0)      | 359(0)  |
| a'' | 419(0)      | 424(1)     | a <sub>u</sub> | 419(0)      | 428(0)  |
| a'' | 432(0)      | 427(0)     | a <sub>u</sub> | 432(0)      | 431(1)  |
| a'  | 437(19)     | 457(9)     | b <sub>u</sub> | 437(19)     | 457(12) |
| a'' | 443(0)      | 455(0)     | b <sub>g</sub> | 443(0)      | 454(0)  |
| a'  | 443(0)      | 459(2)     | a <sub>g</sub> | 443(0)      | 457(0)  |
| a'  | 451(0)      | 475(1)     | a <sub>g</sub> | 451(0)      | 474(0)  |
| a'' | 475(62)     | 495(21)    | a <sub>u</sub> | 475(62)     | 500(32) |
| a'  | 494(30)     | 510(6)a''  | b <sub>u</sub> | 494(30)     | 531(4)  |
| a'' | 503(0)      | 531(3)a'   | b <sub>g</sub> | 503(0)      | 509(0)  |
| a'  | 518(0)      | 535(5)a'   | a <sub>g</sub> | 518(0)      | 540(0)  |
| a'  | 582(21)     | 576(0)a''  | b <sub>u</sub> | 582(21)     | 569(10) |
| a'' | 607(28)     | 582(21)a'  | a <sub>u</sub> | 607(28)     | 607(26) |
| a'  | 620(0)      | 626(39)a'' | a <sub>g</sub> | 620(0)      | 601(0)  |
| a'' | 621(0)      | 627(28)a'  | b <sub>g</sub> | 621(0)      | 631(0)  |
| a'' | 634(0)      | 634(2)a''  | b <sub>g</sub> | 632(0)      | 633(0)  |
| a'  | 641(121)    | 647(15)a'' | b <sub>u</sub> | 641(118)    | 637(39) |

|     |            |            |                |            |            |
|-----|------------|------------|----------------|------------|------------|
| a'  | 674(0)     | 679(1)     | a <sub>g</sub> | 674(0)     | 681(0)     |
| a'  | 713(54)    | 695(80)    | b <sub>u</sub> | 711(57)    | 685(113)   |
| a'' | 1387(0)    | 1255(0)    | b <sub>g</sub> | 1385(0)    | 1329(0)    |
| a'  | 1432(555)  | 1296(66)   | b <sub>u</sub> | 1431(553)  | 1375(82)   |
| a'' | 1445(1)    | 1475(1)    | a <sub>u</sub> | 1445(1)    | 1459(4)    |
| a'  | 1480(0)    | 1501(1)    | a <sub>g</sub> | 1477(0)    | 1477(0)    |
| a'  | 2037(0)    | 1936(256)  | a <sub>g</sub> | 2037(0)    | 1950(0)    |
| a'  | 2043(1704) | 1960(1007) | b <sub>u</sub> | 2044(1707) | 1957(1428) |
| a'' | 2055(0)    | 1961(433)  | b <sub>g</sub> | 2055(0)    | 1964(0)    |
| a'' | 2059(1950) | 1971(1213) | a <sub>u</sub> | 2059(1950) | 1967(1635) |
| a'  | 2094(1811) | 2004(1782) | b <sub>u</sub> | 2094(1809) | 2004(1792) |
| a'  | 2131(0)    | 2040(6)    | a <sub>g</sub> | 2131(0)    | 2039(0)    |

**Table S11.** Harmonic vibrational frequencies(in cm<sup>-1</sup>) and Infrared Intensities ( in Parentheses in km/mol ) for **26-3** and **26-4** .

| -              | 26-3    |         | - | 26-4    |         |
|----------------|---------|---------|---|---------|---------|
|                | B3LYP   | BP86    |   | B3LYP   | BP86    |
| a <sub>2</sub> | 22(0)   | 20(0)   | a | 32(0)   | 29(0)   |
| b <sub>1</sub> | 49(0)   | 45(0)   | a | 35(0)   | 35(0)   |
| a <sub>1</sub> | 61(0)   | 61(0)   | a | 51(0)   | 48(0)   |
| b <sub>2</sub> | 71(0)   | 56(1)   | a | 69(0)   | 67(0)   |
| a <sub>2</sub> | 79(0)   | 79(0)   | a | 76(0)   | 74(0)   |
| a <sub>1</sub> | 81(0)   | 80(0)   | a | 86(0)   | 88(0)   |
| b <sub>2</sub> | 91(0)   | 85(1)   | a | 92(0)   | 90(0)   |
| b <sub>1</sub> | 93(1)   | 92(1)   | a | 94(0)   | 96(0)   |
| a <sub>1</sub> | 100(0)  | 102(0)  | a | 103(0)  | 104(0)  |
| b <sub>2</sub> | 110(0)  | 110(0)  | a | 127(0)  | 135(0)  |
| a <sub>2</sub> | 120(0)  | 116(0)  | a | 134(0)  | 146(0)  |
| a <sub>1</sub> | 204(0)  | 204(0)  | a | 221(3)  | 230(1)  |
| b <sub>1</sub> | 346(1)  | 355(1)  | a | 327(1)  | 314(6)  |
| a <sub>1</sub> | 372(9)  | 367(8)  | a | 357(1)  | 360(3)  |
| a <sub>2</sub> | 403(0)  | 413(0)  | a | 398(12) | 418(0)  |
| b <sub>2</sub> | 414(6)  | 416(7)  | a | 413(0)  | 420(2)  |
| b <sub>1</sub> | 430(0)  | 431(1)  | a | 435(7)  | 434(5)  |
| a <sub>2</sub> | 446(0)  | 455(0)  | a | 438(3)  | 446(2)  |
| b <sub>2</sub> | 447(10) | 478(1)  | a | 452(34) | 462(36) |
| a <sub>1</sub> | 455(7)  | 478(7)  | a | 462(8)  | 477(3)  |
| b <sub>1</sub> | 475(55) | 491(19) | a | 471(19) | 490(0)  |
| a <sub>1</sub> | 492(30) | 528(12) | a | 474(23) | 499(13) |
| b <sub>2</sub> | 495(0)  | 528(0)  | a | 504(16) | 522(14) |
| a <sub>2</sub> | 506(0)  | 519(0)  | a | 507(23) | 527(12) |
| b <sub>1</sub> | 552(22) | 561(29) | a | 591(53) | 570(33) |
| a <sub>1</sub> | 564(9)  | 540(0)  | a | 602(69) | 575(38) |

|                |            |            |   |            |            |
|----------------|------------|------------|---|------------|------------|
| b <sub>2</sub> | 606(46)    | 606(11)    | a | 604(52)    | 600(55)    |
| a <sub>2</sub> | 620(0)     | 627(0)     | a | 628(9)     | 630(28)    |
| b <sub>1</sub> | 621(14)    | 617(11)    | a | 634(9)     | 639(10)    |
| a <sub>1</sub> | 655(2)     | 657(5)     | a | 681(36)    | 662(15)    |
| b <sub>2</sub> | 669(88)    | 677(82)    | a | 709(18)    | 685(20)    |
| a <sub>1</sub> | 702(38)    | 700(34)    | a | 760(29)    | 706(29)    |
| a <sub>2</sub> | 1367(0)    | 1334(0)    | a | 1203(2)    | 1096(15)   |
| b <sub>1</sub> | 1380(1)    | 1392(3)    | a | 1252(364)  | 1150(76)   |
| b <sub>2</sub> | 1401(677)  | 1371(112)  | a | 1497(9)    | 1497(3)    |
| a <sub>1</sub> | 1430(4)    | 1492(1)    | a | 1609(51)   | 1690(30)   |
| b <sub>2</sub> | 2037(165)  | 1948(138)  | a | 2035(92)   | 1941(395)  |
| a <sub>2</sub> | 2049(0)    | 1958(0)    | a | 2047(755)  | 1958(573)  |
| b <sub>1</sub> | 2053(1977) | 1961(1646) | a | 2048(1743) | 1960(1197) |
| a <sub>1</sub> | 2058(1415) | 1967(1139) | a | 2067(1583) | 1975(1172) |
| b <sub>2</sub> | 2093(1739) | 2001(1844) | a | 2101(1046) | 2012(1158) |
| a <sub>1</sub> | 2131(48)   | 2039(59)   | a | 2141(74)   | 2047(47)   |

**Table S12.** Harmonic vibrational frequencies(in cm<sup>-1</sup>) and Infrared Intensities ( in Parentheses in km/mol ) for **26-5T**, **26-6T** and **26-7T** .

| 26-5T |          |         | 26-6T |         |         | 26-7T          |         |         |
|-------|----------|---------|-------|---------|---------|----------------|---------|---------|
|       | B3LYP    | BP86    |       | B3LYP   | BP86    |                | B3LYP   | BP86    |
| a'    | 15(0)    | 45(0)   | a''   | 26(0)   | 20i(0)  | a <sub>2</sub> | 10i(0)  | 2(0)    |
| a''   | 22(0)    | 25(0)   | a'    | 31(0)   | 9(1)    | b <sub>1</sub> | 49(0)   | 45(0)   |
| a''   | 43(0)    | 38(0)   | a''   | 32(0)   | 27(0)   | a <sub>1</sub> | 70(0)   | 67(0)   |
| a''   | 71(1)    | 64(0)   | a''   | 67(0)   | 61(0)   | b <sub>2</sub> | 71(2)   | 47(4)   |
| a'    | 71(0)    | 71(0)   | a'    | 71(1)   | 71(0)   | a <sub>1</sub> | 74(0)   | 74(0)   |
| a'    | 76(0)    | 76(0)   | a'    | 79(0)   | 78(0)   | a <sub>2</sub> | 77(0)   | 78(0)   |
| a''   | 86(0)    | 85(0)   | a'    | 86(0)   | 91(1)   | b <sub>1</sub> | 85(1)   | 86(1)   |
| a'    | 91(2)    | 95(0)   | a''   | 92(0)   | 89(0)   | b <sub>2</sub> | 92(1)   | 90(1)   |
| a'    | 99(0)    | 105(0)  | a'    | 102(0)  | 104(0)  | a <sub>1</sub> | 109(0)  | 104(0)  |
| a'    | 103(0)   | 135(1)  | a'    | 113(0)  | 152(2)  | b <sub>2</sub> | 114(1)  | 98(1)   |
| a''   | 121(2)   | 119(1)  | a''   | 120(1)  | 124(1)  | a <sub>2</sub> | 121(0)  | 116(0)  |
| a'    | 205(1)   | 225(0)  | a'    | 186(0)  | 202(9)  | a <sub>1</sub> | 238(0)  | 234(0)  |
| a'    | 327(1)   | 367(6)  | a''   | 327(1)  | 318(0)  | b <sub>1</sub> | 290(1)  | 337(0)  |
| a''   | 330(215) | 342(0)  | a''   | 341(0)  | 339(0)  | a <sub>2</sub> | 360(0)  | 367(0)  |
| a''   | 340(0)   | 364(1)  | a'    | 341(11) | 316(3)  | a <sub>1</sub> | 366(0)  | 375(0)  |
| a''   | 367(0)   | 392(14) | a'    | 385(21) | 402(2)  | b <sub>1</sub> | 370(1)  | 388(0)  |
| a'    | 410(3)   | 424(9)  | a'    | 399(9)  | 413(5)  | b <sub>2</sub> | 403(6)  | 381(19) |
| a'    | 412(2)   | 427(1)  | a''   | 410(0)  | 415(0)  | b <sub>1</sub> | 410(20) | 430(5)  |
| a'    | 425(1)   | 440(4)  | a'    | 431(15) | 444(29) | a <sub>2</sub> | 410(0)  | 427(0)  |
| a''   | 431(33)  | 433(26) | a''   | 444(1)  | 437(4)  | b <sub>2</sub> | 429(88) | 420(1)  |

|     |            |            |     |            |            |                |            |            |
|-----|------------|------------|-----|------------|------------|----------------|------------|------------|
| a'  | 454(3)     | 472(18)    | a'  | 447(26)    | 448(0)     | a <sub>1</sub> | 443(6)     | 465(4)     |
| a'' | 459(47)    | 484(71)    | a'  | 463(9)     | 482(2)     | b <sub>1</sub> | 465(61)    | 484(0)     |
| a'  | 464(34)    | 477(7)     | a'' | 491(41)    | 503(20)    | a <sub>1</sub> | 470(12)    | 487(0)     |
| a'' | 484(3)     | 487(3)     | a'  | 505(16)    | 523(10)    | a <sub>2</sub> | 493(0)     | 489(0)     |
| a'  | 554(1)     | 517(13)    | a'  | 538(43)    | 551(36)    | a <sub>1</sub> | 507(4)     | 493(8)     |
| a'' | 564(0)     | 552(0)     | a'' | 574(15)    | 543(3)     | b <sub>2</sub> | 515(0)     | 457(18)    |
| a'  | 590(94)    | 597(72)    | a'  | 607(72)    | 568(72)    | b <sub>2</sub> | 549(0)     | 561(18)    |
| a'  | 625(34)    | 625(46)    | a'' | 610(9)     | 580(1)     | a <sub>2</sub> | 556(0)     | 580(0)     |
| a'' | 641(59)    | 586(0)     | a'  | 613(28)    | 618(23)    | b <sub>1</sub> | 566(36)    | 574(40)    |
| a'' | 654(0)     | 647(53)    | a'  | 671(76)    | 673(47)    | a <sub>1</sub> | 601(1)     | 616(0)     |
| a'  | 676(164)   | 666(128)   | a'' | 671(12)    | 642(29)    | b <sub>2</sub> | 607(160)   | 608(81)    |
| a'  | 714(109)   | 739(59)    | a'  | 720(28)    | 682(37)    | a <sub>1</sub> | 629(65)    | 627(47)    |
| a'' | 1314(1)    | 1157(2)    | a'' | 1187(0)    | 1098(1)    | a <sub>2</sub> | 1348(0)    | 1292(0)    |
| a'  | 1358(473)  | 1174(21)   | a'  | 1231(605)  | 1128(264)  | b <sub>2</sub> | 1388(8)    | 1337(1)    |
| a'' | 1429(2)    | 1460(0)    | a'' | 1438(4)    | 1477(0)    | b <sub>1</sub> | 1510(2)    | 1481(0)    |
| a'  | 1453(48)   | 1490(0)    | a'  | 1461(261)  | 1487(31)   | a <sub>1</sub> | 1536(0)    | 1511(0)    |
| a'' | 1958(2406) | 1910(1446) | a'  | 2027(95)   | 1935(539)  | b <sub>2</sub> | 2051(2)    | 1940(152)  |
| a'' | 2066(1008) | 1983(900)  | a'  | 2045(2068) | 1960(960)  | a <sub>2</sub> | 2057(0)    | 1959(0)    |
| a'  | 2070(1538) | 1944(701)  | a'' | 2045(1010) | 1964(832)  | b <sub>1</sub> | 2059(2316) | 1961(1961) |
| a'  | 2078(720)  | 1995(1426) | a'  | 2088(836)  | 1988(801)  | a <sub>1</sub> | 2064(1271) | 1973(1037) |
| a'  | 2096(736)  | 2001(561)  | a'  | 2097(1456) | 2009(1671) | b <sub>2</sub> | 2087(3138) | 1985(2129) |
| a'  | 2149(103)  | 2058(255)  | a'  | 2145(152)  | 2048(52)   | a <sub>1</sub> | 2134(34)   | 2036(50)   |

---



**Table S13.** Atomic coordinates of the optimized structure **15-1**.

| <b>_15-1</b> | B3LYP     |           |           | BP86      |           |           |
|--------------|-----------|-----------|-----------|-----------|-----------|-----------|
|              | X         | Y         | Z         | X         | Y         | Z         |
| Mn           | 0.000000  | 0.000000  | 0.154019  | 0.000000  | 0.000000  | 0.155700  |
| H            | 0.000000  | 0.000000  | 1.728898  | 0.000000  | 0.000000  | 1.732063  |
| C            | 0.000000  | 1.844576  | 0.376009  | 0.000000  | 1.828967  | 0.376175  |
| C            | -1.844576 | 0.000000  | 0.376009  | -1.828967 | 0.000000  | 0.376175  |
| C            | 1.844576  | 0.000000  | 0.376009  | 1.828967  | 0.000000  | 0.376175  |
| C            | 0.000000  | -1.844576 | 0.376009  | 0.000000  | -1.828967 | 0.376175  |
| O            | 2.979638  | 0.000000  | 0.577351  | 2.979279  | 0.000000  | 0.573302  |
| O            | 0.000000  | -2.979638 | 0.577351  | 0.000000  | -2.979279 | 0.573302  |
| O            | -2.979638 | 0.000000  | 0.577351  | -2.979279 | 0.000000  | 0.573302  |
| O            | 0.000000  | 2.979638  | 0.577351  | 0.000000  | 2.979279  | 0.573302  |
| C            | 0.000000  | 0.000000  | -1.702478 | 0.000000  | 0.000000  | -1.688525 |
| O            | 0.000000  | 0.000000  | -2.857995 | 0.000000  | 0.000000  | -2.858409 |

**Table S14.** Atomic coordinates of the optimized structure **14-1**.

| <b>_14-1</b> | B3LYP     |           |           | BP86      |           |           |
|--------------|-----------|-----------|-----------|-----------|-----------|-----------|
|              | X         | Y         | Z         | X         | Y         | Z         |
| Mn           | 0.377917  | -0.237922 | 0.000000  | 0.423412  | -0.181494 | 0.000000  |
| C            | 0.413828  | -0.566942 | 1.826636  | 0.469463  | -0.534209 | 1.803161  |
| C            | 0.413828  | -0.566942 | -1.826636 | 0.469463  | -0.534209 | -1.803161 |
| C            | 0.510399  | 1.619850  | 0.000000  | 0.312067  | 1.661272  | 0.000000  |
| O            | 0.413828  | -0.859963 | -2.943003 | 0.469463  | -0.851501 | -2.928748 |
| O            | 0.577083  | 2.774506  | 0.000000  | 0.213720  | 2.829016  | 0.000000  |
| O            | 0.413828  | -0.859963 | 2.943003  | 0.469463  | -0.851501 | 2.928748  |
| C            | -1.419260 | -0.235197 | 0.000000  | -1.331267 | -0.367663 | 0.000000  |
| O            | -2.576923 | -0.271923 | 0.000000  | -2.497631 | -0.509590 | 0.000000  |
| H            | 0.416787  | -1.817812 | 0.000000  | 0.656232  | -1.745188 | 0.000000  |

**Table S15.** Atomic coordinates of the optimized structure **14-2**.

| <b>14-2</b> | B3LYP     |           |           | BP86      |           |           |
|-------------|-----------|-----------|-----------|-----------|-----------|-----------|
|             | X         | Y         | Z         | X         | Y         | Z         |
| Mn          | 0.000000  | 0.000000  | 0.228194  | 0.000000  | 0.000000  | 0.234176  |
| H           | 0.000000  | 0.000000  | -1.296991 | 0.000000  | 0.000000  | -1.281241 |
| C           | 0.000000  | 1.846331  | 0.044041  | 0.000000  | 1.828077  | 0.045551  |
| C           | 1.846331  | 0.000000  | 0.044041  | 1.828077  | 0.000000  | 0.045551  |
| C           | -1.846331 | 0.000000  | 0.044041  | -1.828077 | 0.000000  | 0.045551  |
| C           | 0.000000  | -1.846331 | 0.044041  | 0.000000  | -1.828077 | 0.045551  |
| O           | -2.981798 | 0.000000  | -0.170776 | -2.977704 | 0.000000  | -0.177075 |
| O           | 0.000000  | -2.981798 | -0.170776 | 0.000000  | -2.977704 | -0.177075 |
| O           | 2.981798  | 0.000000  | -0.170776 | 2.977704  | 0.000000  | -0.177075 |
| O           | 0.000000  | 2.981798  | -0.170776 | 0.000000  | 2.977704  | -0.177075 |

**Table S16.** Atomic coordinates of the optimized structure **14-3T**.

| 14-3T | B3LYP     |           |           | BP86      |           |           |
|-------|-----------|-----------|-----------|-----------|-----------|-----------|
|       | X         | Y         | Z         | X         | Y         | Z         |
| Mn    | 0.000000  | 0.000000  | 0.280227  | 0.000000  | 0.000000  | 0.255214  |
| C     | 0.000000  | 1.809437  | 0.675035  | 0.000000  | 1.790075  | 0.656292  |
| C     | 0.000000  | -1.809437 | 0.675035  | 0.000000  | -1.790075 | 0.656292  |
| C     | 1.604839  | 0.000000  | -0.814669 | 1.578473  | 0.000000  | -0.773422 |
| O     | 0.000000  | -2.916718 | 1.008635  | 0.000000  | -2.909969 | 0.998864  |
| O     | 2.559798  | 0.000000  | -1.457987 | 2.549275  | 0.000000  | -1.423740 |
| O     | 0.000000  | 2.916718  | 1.008635  | 0.000000  | 2.909969  | 0.998864  |
| C     | -1.604839 | 0.000000  | -0.814669 | -1.578473 | 0.000000  | -0.773422 |
| O     | -2.559798 | 0.000000  | -1.457987 | -2.549275 | 0.000000  | -1.423740 |
| H     | 0.000000  | 0.000000  | 1.859552  | 0.000000  | 0.000000  | 1.823233  |

**Table S17.** Atomic coordinates of the optimized structure **13-1**.

| 13-1 | B3LYP     |           |           | BP86      |           |           |
|------|-----------|-----------|-----------|-----------|-----------|-----------|
|      | X         | Y         | Z         | X         | Y         | Z         |
| Mn   | -0.525244 | -0.596119 | 0.000000  | -0.512757 | -0.632131 | 0.000000  |
| C    | 1.293164  | -1.020420 | 0.000000  | 1.305314  | -0.965501 | 0.000000  |
| C    | -0.428093 | 0.650873  | 1.279558  | -0.454304 | 0.615077  | 1.230432  |
| C    | -0.428093 | 0.650873  | -1.279558 | -0.454304 | 0.615077  | -1.230432 |
| O    | -0.428093 | 1.467004  | 2.103500  | -0.454304 | 1.459046  | 2.051687  |
| O    | -0.428093 | 1.467004  | -2.103500 | -0.454304 | 1.459046  | -2.051687 |
| O    | 2.431465  | -1.234082 | 0.000000  | 2.473424  | -1.088754 | 0.000000  |
| H    | -2.093004 | -0.384405 | 0.000000  | -2.079851 | -0.419363 | 0.000000  |

**Table S18.** Atomic coordinates of the optimized structure **13-2**.

| 13-2 | B3LYP     |           |           | BP86      |           |           |
|------|-----------|-----------|-----------|-----------|-----------|-----------|
|      | X         | Y         | Z         | X         | Y         | Z         |
| Mn   | -0.480633 | -0.269273 | 0.000000  | -0.463999 | -0.350060 | 0.000000  |
| C    | -0.523707 | 0.022526  | 1.823823  | -0.507385 | -0.024719 | 1.797282  |
| C    | -0.523707 | 0.022526  | -1.823823 | -0.507385 | -0.024719 | -1.797282 |
| C    | -0.523707 | 0.349060  | -2.935058 | -0.507385 | 0.349108  | -2.911123 |
| O    | -0.523707 | 0.349060  | 2.935058  | -0.507385 | 0.349108  | 2.911123  |
| O    | 1.295227  | -0.108981 | 0.000000  | 1.243795  | 0.019029  | 0.000000  |
| O    | 2.449212  | 0.035773  | 0.000000  | 2.396478  | 0.278519  | 0.000000  |
| H    | -0.685440 | 1.244251  | 0.000000  | -0.827817 | 1.120077  | 0.000000  |

**Table S19.** Atomic coordinates of the optimized structure **13-3T**.

| <b>13-3T</b> | a        | B3LYP     |           |          | BP86      |           |  |
|--------------|----------|-----------|-----------|----------|-----------|-----------|--|
|              | X        | Y         | Z         | X        | Y         | Z         |  |
| Mn           | 0.000000 | 0.000000  | 0.331501  | 0.000000 | 0.000000  | 0.319999  |  |
| H            | 0.000000 | 0.000000  | 1.931592  | 0.000000 | 0.000000  | 1.916957  |  |
| C            | 0.000000 | 1.834482  | 0.631306  | 0.000000 | 1.815669  | 0.631242  |  |
| C            | 0.000000 | -1.834482 | 0.631306  | 0.000000 | -1.815669 | 0.631242  |  |
| O            | 0.000000 | -2.963356 | 0.891044  | 0.000000 | -2.957486 | 0.900853  |  |
| O            | 0.000000 | 2.963356  | 0.891044  | 0.000000 | 2.957486  | 0.900853  |  |
| C            | 0.000000 | 0.000000  | -1.631699 | 0.000000 | 0.000000  | -1.612710 |  |
| O            | 0.000000 | 0.000000  | -2.782663 | 0.000000 | 0.000000  | -2.778653 |  |

**Table S20.** Atomic coordinates of the optimized structure **13-4**.

| <b>13-4</b> | B3LYP    |           |           | BP86     |           |           |
|-------------|----------|-----------|-----------|----------|-----------|-----------|
|             | X        | Y         | Z         | X        | Y         | Z         |
| Mn          | 0.000000 | 0.000000  | 0.283962  | 0.000000 | 0.000000  | 0.275382  |
| H           | 0.000000 | 0.000000  | 1.878808  | 0.000000 | 0.000000  | 1.865653  |
| C           | 0.000000 | 1.826643  | 0.625348  | 0.000000 | 1.805010  | 0.627250  |
| C           | 0.000000 | -1.826643 | 0.625348  | 0.000000 | -1.805010 | 0.627250  |
| O           | 0.000000 | -2.941869 | 0.930339  | 0.000000 | -2.934187 | 0.940709  |
| O           | 0.000000 | 2.941869  | 0.930339  | 0.000000 | 2.934187  | 0.940709  |
| C           | 0.000000 | 0.000000  | -1.578167 | 0.000000 | 0.000000  | -1.566027 |
| O           | 0.000000 | 0.000000  | -2.737306 | 0.000000 | 0.000000  | -2.741550 |

**Table S21.** Atomic coordinates of the optimized structure **29-1**.

| <b>29-1</b> | B3LYP     |           |           | BP86      |           |           |
|-------------|-----------|-----------|-----------|-----------|-----------|-----------|
|             | X         | Y         | Z         | X         | Y         | Z         |
| Mn          | 0.023730  | -1.429978 | 0.000000  | 0.046045  | -1.409311 | 0.000000  |
| Mn          | 0.328897  | 1.540246  | 0.000000  | 0.305031  | 1.512303  | 0.000000  |
| C           | -1.268101 | -1.133916 | 1.310818  | -1.241140 | -1.127960 | 1.300221  |
| C           | 0.331870  | 1.425738  | 1.863437  | 0.298195  | 1.438778  | 1.848884  |
| C           | 0.331870  | 1.425738  | -1.863437 | 0.298195  | 1.438778  | -1.848884 |
| C           | 1.343163  | -1.449533 | -1.311048 | 1.352121  | -1.453718 | -1.306517 |
| C           | 1.343163  | -1.449533 | 1.311048  | 1.352121  | -1.453718 | 1.306517  |
| C           | -0.194483 | -3.231082 | 0.000000  | -0.177590 | -3.199092 | 0.000000  |
| C           | -1.497355 | 1.698589  | 0.000000  | -1.500714 | 1.699696  | 0.000000  |
| O           | -2.075509 | -0.989205 | 2.123773  | -2.064227 | -1.009741 | 2.121230  |
| O           | 0.324393  | 1.396280  | 3.017832  | 0.280487  | 1.453502  | 3.017885  |
| O           | 2.164526  | -1.488766 | 2.123720  | 2.176934  | -1.523073 | 2.133214  |
| O           | 2.164526  | -1.488766 | -2.123720 | 2.176934  | -1.523073 | -2.133214 |
| O           | 0.324393  | 1.396280  | -3.017832 | 0.280487  | 1.453502  | -3.017885 |
| O           | -0.334360 | -4.379778 | 0.000000  | -0.324382 | -4.361645 | 0.000000  |
| O           | -2.646976 | 1.826390  | 0.000000  | -2.660272 | 1.866009  | 0.000000  |
| H           | 1.830675  | 0.737938  | 0.000000  | 1.757348  | 0.659564  | 0.000000  |
| C           | 0.608325  | 3.330037  | 0.000000  | 0.618837  | 3.283637  | 0.000000  |
| O           | 0.770547  | 4.476614  | 0.000000  | 0.813108  | 4.440381  | 0.000000  |
| H           | 2.043296  | 1.533877  | 0.000000  | 1.993719  | 1.486010  | 0.000000  |
| C           | -1.268101 | -1.133916 | -1.310818 | -1.241140 | -1.127960 | -1.300221 |
| O           | -2.075509 | -0.989205 | -2.123773 | -2.064227 | -1.009741 | -2.121230 |

**Table S22.** Atomic coordinates of the optimized structure **29-2**.

| <b>29-2</b> | B3LYP     |           |           | BP86      |           |           |
|-------------|-----------|-----------|-----------|-----------|-----------|-----------|
|             | X         | Y         | Z         | X         | Y         | Z         |
| C           | 1.524006  | 1.557122  | -1.078314 | 1.434360  | 1.609377  | -0.938581 |
| O           | 1.470432  | 2.501729  | -1.728244 | 1.435795  | 2.606222  | -1.538640 |
| C           | 1.252682  | -1.009879 | -1.566158 | 1.057580  | -0.861502 | -1.590692 |
| O           | 1.095364  | -1.628805 | -2.519702 | 0.927767  | -1.413019 | -2.608202 |
| Mn          | 1.591659  | 0.008793  | -0.016652 | 1.494130  | 0.008663  | 0.002240  |
| Mn          | -1.719280 | 0.028152  | -0.113637 | -1.599471 | 0.036462  | -0.101429 |
| C           | 3.422844  | -0.177709 | -0.178844 | 3.279006  | -0.203962 | -0.295520 |
| C           | -3.493155 | -0.012001 | -0.464252 | -3.363445 | 0.041591  | -0.431434 |
| C           | -1.713461 | 1.851323  | -0.394238 | -1.617816 | 1.852584  | -0.337416 |
| C           | -1.617210 | -1.784873 | -0.430708 | -1.569113 | -1.757404 | -0.485947 |
| C           | 1.715007  | 1.067990  | 1.523755  | 1.774553  | 0.939205  | 1.578177  |
| C           | 1.400134  | -1.524993 | 1.048743  | 1.370855  | -1.588808 | 0.940989  |
| O           | -1.568789 | -2.907209 | -0.712178 | -1.610993 | -2.883393 | -0.807307 |
| O           | -1.709490 | 2.979430  | -0.652069 | -1.675039 | 2.999839  | -0.565108 |
| O           | 1.753467  | 1.723614  | 2.466232  | 1.941509  | 1.532873  | 2.565918  |
| O           | 1.262123  | -2.456588 | 1.705803  | 1.298464  | -2.586189 | 1.535658  |

|   |           |           |           |           |           |           |
|---|-----------|-----------|-----------|-----------|-----------|-----------|
| O | -4.624658 | -0.032027 | -0.715220 | -4.516336 | 0.054315  | -0.647060 |
| O | 4.567262  | -0.289404 | -0.267711 | 4.426535  | -0.341069 | -0.470011 |
| H | -1.452295 | 0.061335  | -1.671704 | -1.362671 | 0.128768  | -1.662648 |
| H | -0.004097 | 0.258777  | 0.278154  | -0.058725 | 0.272589  | 0.651145  |
| C | -1.937417 | -0.002043 | 1.719192  | -1.882928 | -0.068404 | 1.706810  |
| O | -2.079915 | -0.019910 | 2.870054  | -2.083125 | -0.132772 | 2.861365  |

**Table S23.** Atomic coordinates of the optimized structure **28-1**.

| <b>28-1</b> | B3LYP     |           |           | BP86      |           |           |
|-------------|-----------|-----------|-----------|-----------|-----------|-----------|
|             | X         | Y         | Z         | X         | Y         | Z         |
| Mn          | -1.361141 | 0.000000  | 0.000000  | -1.351601 | 0.000000  | 0.000000  |
| Mn          | 1.361141  | 0.000000  | 0.000000  | 1.351601  | 0.000000  | 0.000000  |
| C           | -1.433033 | 1.867563  | 0.000000  | -1.435772 | 1.848268  | 0.000000  |
| C           | 1.433033  | 1.867563  | 0.000000  | 1.435772  | 1.848268  | 0.000000  |
| C           | 2.584814  | 0.000000  | 1.360925  | 2.576310  | 0.000000  | 1.329438  |
| C           | 1.433033  | -1.867563 | 0.000000  | 1.435772  | -1.848268 | 0.000000  |
| C           | -1.433033 | -1.867563 | 0.000000  | -1.435772 | -1.848268 | 0.000000  |
| C           | -2.584814 | 0.000000  | 1.360925  | -2.576310 | 0.000000  | 1.329438  |
| C           | -2.584814 | 0.000000  | -1.360925 | -2.576310 | 0.000000  | -1.329438 |
| C           | 2.584814  | 0.000000  | -1.360925 | 2.576310  | 0.000000  | -1.329438 |
| O           | -1.581141 | 3.010382  | 0.000000  | -1.607823 | 3.002820  | 0.000000  |
| O           | 1.581141  | 3.010382  | 0.000000  | 1.607823  | 3.002820  | 0.000000  |
| O           | 3.326646  | 0.000000  | 2.247732  | 3.347412  | 0.000000  | 2.211444  |
| O           | -3.326646 | 0.000000  | 2.247732  | -3.347412 | 0.000000  | 2.211444  |
| O           | -1.581141 | -3.010382 | 0.000000  | -1.607823 | -3.002820 | 0.000000  |
| O           | 1.581141  | -3.010382 | 0.000000  | 1.607823  | -3.002820 | 0.000000  |
| O           | -3.326646 | 0.000000  | -2.247732 | -3.347412 | 0.000000  | -2.211444 |
| O           | 3.326646  | 0.000000  | -2.247732 | 3.347412  | 0.000000  | -2.211444 |
| H           | 0.000000  | 0.000000  | -1.084224 | 0.000000  | 0.000000  | -1.089518 |
| H           | 0.000000  | 0.000000  | 1.084224  | 0.000000  | 0.000000  | 1.089518  |

**Table S24.** Atomic coordinates of the optimized structure **27-1**.

| <b>27-1</b> | B3LYP     |           |           | BP86      |           |           |
|-------------|-----------|-----------|-----------|-----------|-----------|-----------|
|             | X         | Y         | Z         | X         | Y         | Z         |
| Mn          | 0.026916  | 1.182331  | 0.000000  | -0.034703 | 1.159143  | 0.000000  |
| Mn          | 0.055781  | -1.228810 | 0.000000  | 0.254252  | -1.163740 | 0.000000  |
| C           | 1.829677  | 1.675100  | 0.000000  | 1.547908  | 2.106547  | 0.000000  |
| C           | 1.649347  | -2.060242 | 0.000000  | 1.847772  | -1.946119 | 0.000000  |
| C           | -0.568641 | -2.313956 | 1.329334  | -0.297316 | -2.284036 | 1.294142  |
| C           | -1.751879 | 0.608742  | 0.000000  | -1.671824 | 0.240800  | 0.000000  |
| C           | -0.346488 | 2.346325  | 1.380744  | -0.657903 | 2.188482  | 1.372159  |
| C           | -0.346488 | 2.346325  | -1.380744 | -0.657903 | 2.188482  | -1.372159 |
| C           | -0.568641 | -2.313956 | -1.329334 | -0.297316 | -2.284036 | -1.294142 |
| O           | 2.948092  | 1.943000  | 0.000000  | 2.555410  | 2.690844  | 0.000000  |

|   |           |           |           |           |           |           |
|---|-----------|-----------|-----------|-----------|-----------|-----------|
| O | 2.700221  | -2.548189 | 0.000000  | 2.920676  | -2.424673 | 0.000000  |
| O | -0.965383 | -2.971624 | 2.195295  | -0.657903 | -2.992176 | 2.158318  |
| O | -0.568641 | 3.040083  | 2.276336  | -1.042558 | 2.814742  | 2.281430  |
| O | -2.886822 | 0.390074  | 0.000000  | -2.797057 | -0.085259 | 0.000000  |
| O | -0.568641 | 3.040083  | -2.276336 | -1.042558 | 2.814742  | -2.281430 |
| O | -0.965383 | -2.971624 | -2.195295 | -0.657903 | -2.992176 | -2.158318 |
| H | 0.501853  | 0.028758  | -1.128275 | 0.702949  | 0.122928  | -1.101085 |
| H | 0.501853  | 0.028758  | 1.128275  | 0.702949  | 0.122928  | 1.101085  |

**Table S25.** Atomic coordinates of the optimized structure **27-2**.

| 27-2 | B3LYP     |           |           | BP86      |           |           |
|------|-----------|-----------|-----------|-----------|-----------|-----------|
|      | X         | Y         | Z         | X         | Y         | Z         |
| Mn   | -0.036832 | 1.271670  | 0.000000  | -0.892188 | 0.856442  | 0.000000  |
| Mn   | -0.071387 | -1.216169 | 0.000000  | 0.802885  | -0.892998 | 0.000000  |
| C    | 1.288000  | -2.461217 | 0.000000  | 2.627335  | -0.831398 | 0.000000  |
| C    | -0.073203 | -1.117319 | 1.859848  | 0.728168  | -0.826131 | 1.846473  |
| C    | -1.438376 | -2.449436 | 0.000000  | 0.716766  | -2.713915 | 0.000000  |
| C    | -1.405172 | 2.489010  | 0.000000  | -2.691003 | 0.747236  | 0.000000  |
| C    | -0.073203 | -1.117319 | -1.859848 | 0.728168  | -0.826131 | -1.846473 |
| O    | 2.164007  | -3.213671 | 0.000000  | 3.794598  | -0.759686 | 0.000000  |
| O    | -0.073203 | -1.067676 | 3.012037  | 0.700530  | -0.804600 | 3.013281  |
| O    | -2.284579 | 3.239755  | 0.000000  | -3.860677 | 0.657201  | 0.000000  |
| O    | -2.323421 | -3.191696 | 0.000000  | 0.626967  | -3.880330 | 0.000000  |
| O    | -0.073203 | -1.067676 | -3.012037 | 0.700530  | -0.804600 | -3.013281 |
| H    | -1.241363 | -0.016117 | 0.000000  | -0.872830 | -0.893153 | 0.000000  |
| H    | 1.114491  | -0.010431 | 0.000000  | 0.835108  | 0.793229  | 0.000000  |
| C    | 0.872401  | 2.165687  | 1.278676  | -0.931496 | 2.125184  | 1.242182  |
| C    | 0.872401  | 2.165687  | -1.278676 | -0.931496 | 2.125184  | -1.242182 |
| O    | 1.456153  | 2.687261  | 2.132163  | -0.931496 | 2.934360  | 2.094494  |
| O    | 1.456153  | 2.687261  | -2.132163 | -0.931496 | 2.934360  | -2.094494 |

**Table S26.** Atomic coordinates of the optimized structure **27-5**.

| 27-5 | B3LYP     |           |           | BP86      |           |           |
|------|-----------|-----------|-----------|-----------|-----------|-----------|
|      | X         | Y         | Z         | X         | Y         | Z         |
| Mn   | 0.030342  | -1.098738 | 0.000000  | 0.013399  | -1.081603 | 0.000000  |
| Mn   | -0.452821 | 1.538535  | 0.000000  | -0.481270 | 1.527449  | 0.000000  |
| C    | 0.034032  | -1.147608 | 1.867421  | 0.002844  | -1.147821 | 1.849639  |
| C    | -0.536992 | 1.677075  | 1.866830  | -0.521510 | 1.689298  | 1.839968  |
| C    | -0.536992 | 1.677075  | -1.866830 | -0.521510 | 1.689298  | -1.839968 |
| C    | 0.034032  | -1.147608 | -1.867421 | 0.002844  | -1.147821 | -1.849639 |
| C    | 1.612372  | -2.020716 | 0.000000  | 1.593661  | -1.966654 | 0.000000  |
| C    | -1.050554 | -2.572414 | 0.000000  | -0.981522 | -2.583393 | 0.000000  |
| C    | 0.678512  | 2.959870  | 0.000000  | 0.661930  | 2.899467  | 0.000000  |
| O    | 0.050550  | -1.264439 | 3.014031  | 0.006911  | -1.295859 | 3.007396  |

|   |           |           |           |           |           |           |
|---|-----------|-----------|-----------|-----------|-----------|-----------|
| O | -0.611700 | 1.883466  | 3.000068  | -0.553940 | 1.934413  | 2.984765  |
| O | 2.629580  | -2.570987 | 0.000000  | 2.627751  | -2.517520 | 0.000000  |
| O | 0.050550  | -1.264439 | -3.014031 | 0.006911  | -1.295859 | -3.007396 |
| O | -0.611700 | 1.883466  | -3.000068 | -0.553940 | 1.934413  | -2.984765 |
| O | -1.769629 | -3.478549 | 0.000000  | -1.656657 | -3.541713 | 0.000000  |
| O | 1.465893  | 3.811965  | 0.000000  | 1.473484  | 3.752477  | 0.000000  |
| H | -1.315208 | -0.011890 | 0.000000  | -1.341966 | -0.028211 | 0.000000  |
| H | 0.842382  | 0.459056  | 0.000000  | 0.814178  | 0.524984  | 0.000000  |

**Table S27.** Atomic coordinates of the optimized structure **27-3T**.

| 27-3T | B3LYP     |           |           | BP86      |           |           |
|-------|-----------|-----------|-----------|-----------|-----------|-----------|
|       | X         | Y         | Z         | X         | Y         | Z         |
| Mn    | 0.772576  | 0.953037  | 0.000000  | 0.488887  | -1.094298 | 0.000000  |
| Mn    | -0.793630 | -1.087376 | 0.000000  | -0.677397 | 1.147244  | 0.000000  |
| C     | 0.706185  | 0.886520  | 1.859014  | 0.464330  | -1.023434 | 1.846688  |
| C     | -0.809412 | -2.094055 | 1.656370  | -1.463640 | 1.647629  | 1.629814  |
| C     | -2.628764 | -1.129991 | 0.000000  | 0.101286  | 2.772892  | 0.000000  |
| C     | 0.706185  | 0.886520  | -1.859014 | 0.464330  | -1.023434 | -1.846688 |
| C     | 0.454053  | 2.760065  | 0.000000  | 2.244311  | -1.559466 | 0.000000  |
| C     | 2.602987  | 1.104807  | 0.000000  | -0.109096 | -2.809995 | 0.000000  |
| C     | -0.809412 | -2.094055 | -1.656370 | -1.463640 | 1.647629  | -1.629814 |
| O     | 0.664469  | 0.849103  | 3.011340  | 0.464330  | -1.001414 | 3.014059  |
| O     | -0.809412 | -2.728280 | 2.616815  | -2.005866 | 2.013044  | 2.598967  |
| O     | -3.788417 | -1.108276 | 0.000000  | 0.654722  | 3.809747  | 0.000000  |
| O     | 0.216781  | 3.891681  | 0.000000  | 3.383431  | -1.831456 | 0.000000  |
| O     | 0.664469  | 0.849103  | -3.011340 | 0.464330  | -1.001414 | -3.014059 |
| O     | 3.757720  | 1.164379  | 0.000000  | -0.522001 | -3.905805 | 0.000000  |
| O     | -0.809412 | -2.728280 | -2.616815 | -2.005866 | 2.013044  | -2.598967 |
| H     | 0.919874  | -0.742534 | 0.000000  | -1.115612 | -0.547997 | 0.000000  |
| H     | -0.894038 | 0.666730  | 0.000000  | 0.936418  | 0.547475  | 0.000000  |

**Table S28.** Atomic coordinates of the optimized structure **27-4T**.

| 27-4T | B3LYP     |           |           | BP86      |           |           |
|-------|-----------|-----------|-----------|-----------|-----------|-----------|
|       | X         | Y         | Z         | X         | Y         | Z         |
| Mn    | 0.000000  | 0.000000  | -1.178676 | 0.000000  | 0.000000  | -1.152073 |
| Mn    | 0.000000  | 0.000000  | 1.583440  | 0.000000  | 0.000000  | 1.576244  |
| C     | 0.000000  | 1.861423  | -1.258157 | 0.000000  | 1.844613  | -1.256838 |
| C     | 0.000000  | 1.877080  | 1.624549  | 0.000000  | 1.852062  | 1.625628  |
| C     | 0.000000  | -1.877080 | 1.624549  | 0.000000  | -1.852062 | 1.625628  |
| C     | 0.000000  | -1.861423 | -1.258157 | 0.000000  | -1.844613 | -1.256838 |
| C     | -1.383679 | 0.000000  | -2.373071 | -1.359356 | 0.000000  | -2.346979 |
| C     | 1.383679  | 0.000000  | -2.373071 | 1.359356  | 0.000000  | -2.346979 |
| C     | 0.000000  | 0.000000  | 3.506825  | 0.000000  | 0.000000  | 3.456978  |
| O     | 0.000000  | 3.005098  | -1.414468 | 0.000000  | 2.997184  | -1.450942 |
| O     | 0.000000  | 3.026645  | 1.728043  | 0.000000  | 3.016173  | 1.743566  |
| O     | -2.283836 | 0.000000  | -3.101066 | -2.256719 | 0.000000  | -3.101429 |
| O     | 0.000000  | -3.005098 | -1.414468 | 0.000000  | -2.997184 | -1.450942 |

|   |           |           |           |           |           |           |
|---|-----------|-----------|-----------|-----------|-----------|-----------|
| O | 0.000000  | -3.026645 | 1.728043  | 0.000000  | -3.016173 | 1.743566  |
| O | 2.283836  | 0.000000  | -3.101066 | 2.256719  | 0.000000  | -3.101429 |
| O | 0.000000  | 0.000000  | 4.657954  | 0.000000  | 0.000000  | 4.624524  |
| H | 1.086802  | 0.000000  | 0.128167  | 1.080365  | 0.000000  | 0.168396  |
| H | -1.086802 | 0.000000  | 0.128167  | -1.080365 | 0.000000  | 0.168396  |

**Table S29.** Atomic coordinates of the optimized structure **26-1**.

| <b>26-1</b> | B3LYP     |           |           | BP86      |           |           |
|-------------|-----------|-----------|-----------|-----------|-----------|-----------|
|             | X         | Y         | Z         | X         | Y         | Z         |
| –           |           |           |           |           |           |           |
| Mn          | -0.156488 | 1.232809  | 0.000000  | 0.233525  | 1.055292  | 0.000000  |
| Mn          | 0.157571  | -1.233212 | 0.000000  | 0.190138  | -1.319163 | 0.000000  |
| C           | 1.580811  | 1.670134  | 0.000000  | 1.883021  | 1.684983  | 0.000000  |
| C           | 0.522792  | -2.424768 | 1.353315  | -0.067142 | -2.514785 | 1.350048  |
| C           | -1.580323 | -1.668153 | 0.000000  | -1.526259 | -0.916922 | 0.000000  |
| C           | -0.523412 | 2.423878  | 1.353242  | -0.250814 | 2.200327  | 1.314417  |
| C           | -0.523412 | 2.423878  | -1.353242 | -0.250814 | 2.200327  | -1.314417 |
| C           | 0.522792  | -2.424768 | -1.353315 | -0.067142 | -2.514785 | -1.350048 |
| O           | 2.713335  | 1.920852  | 0.000000  | 2.992234  | 2.073999  | 0.000000  |
| O           | 0.742693  | -3.146634 | 2.229437  | -0.250814 | -3.245199 | 2.247236  |
| O           | -0.744384 | 3.145488  | 2.229312  | -0.548179 | 2.923322  | 2.189325  |
| O           | -2.713172 | -1.917422 | 0.000000  | -2.679566 | -0.671491 | 0.000000  |
| O           | -0.744384 | 3.145488  | -2.229312 | -0.548179 | 2.923322  | -2.189325 |
| O           | 0.742693  | -3.146634 | -2.229437 | -0.250814 | -3.245199 | -2.247236 |
| H           | 0.001592  | -0.000116 | -1.166595 | 0.682938  | -0.154068 | -1.133745 |
| H           | 0.001592  | -0.000116 | 1.166595  | 0.682938  | -0.154068 | 1.133745  |

**Table S30.** Atomic coordinates of the optimized structure **26-2**.

| <b>26-2</b> | B3LYP     |           |           | BP86      |           |           |
|-------------|-----------|-----------|-----------|-----------|-----------|-----------|
|             | X         | Y         | Z         | X         | Y         | Z         |
| –           |           |           |           |           |           |           |
| Mn          | 0.121982  | 1.236757  | 0.000000  | 0.081716  | 1.210557  | 0.000000  |
| Mn          | -0.121982 | -1.236757 | 0.000000  | -0.081716 | -1.210557 | 0.000000  |
| C           | 1.913071  | 1.276074  | 0.000000  | 1.842074  | 1.245746  | 0.000000  |
| C           | -0.028444 | -2.479380 | 1.353447  | -0.013519 | -2.452631 | 1.323358  |
| C           | -1.913071 | -1.276074 | 0.000000  | -1.842074 | -1.245746 | 0.000000  |
| C           | 0.028444  | 2.479380  | 1.353447  | 0.013519  | 2.452631  | 1.323358  |
| C           | 0.028444  | 2.479380  | -1.353447 | 0.013519  | 2.452631  | -1.323358 |
| C           | -0.028444 | -2.479380 | -1.353447 | -0.013519 | -2.452631 | -1.323358 |
| O           | 3.072988  | 1.268397  | 0.000000  | 3.018880  | 1.254096  | 0.000000  |
| O           | 0.028444  | -3.231647 | 2.229740  | 0.013519  | -3.230156 | 2.200425  |
| O           | -0.028444 | 3.231647  | 2.229740  | -0.013519 | 3.230156  | 2.200425  |
| O           | -3.072988 | -1.268397 | 0.000000  | -3.018880 | -1.254096 | 0.000000  |
| O           | -0.028444 | 3.231647  | -2.229740 | -0.013519 | 3.230156  | -2.200425 |
| O           | 0.028444  | -3.231647 | -2.229740 | 0.013519  | -3.230156 | -2.200425 |
| H           | 0.000000  | 0.000000  | -1.167137 | 0.000000  | 0.000000  | -1.192664 |
| H           | 0.000000  | 0.000000  | 1.167137  | 0.000000  | 0.000000  | 1.192664  |



**Table S31.** Atomic coordinates of the optimized structure **26-3**.

| <b>26-3</b> | B3LYP     |           |           | BP86      |           |           |
|-------------|-----------|-----------|-----------|-----------|-----------|-----------|
|             | X         | Y         | Z         | X         | Y         | Z         |
| Mn          | 0.000000  | 1.284513  | -0.362464 | 0.000000  | 1.261002  | -0.389869 |
| Mn          | 0.000000  | -1.284513 | -0.362464 | 0.000000  | -1.261002 | -0.389869 |
| H           | 1.142415  | 0.000000  | -0.404780 | 1.154850  | 0.000000  | -0.501505 |
| H           | -1.142415 | 0.000000  | -0.404780 | -1.154850 | 0.000000  | -0.501505 |
| C           | -1.346729 | 2.505121  | -0.604577 | -1.317139 | 2.486429  | -0.574345 |
| C           | 0.000000  | 1.571436  | 1.408723  | 0.000000  | 1.524743  | 1.351542  |
| C           | 1.346729  | 2.505121  | -0.604577 | 1.317139  | 2.486429  | -0.574345 |
| C           | -1.346729 | -2.505121 | -0.604577 | -1.317139 | -2.486429 | -0.574345 |
| C           | 0.000000  | -1.571436 | 1.408723  | 0.000000  | -1.524743 | 1.351542  |
| C           | 1.346729  | -2.505121 | -0.604577 | 1.317139  | -2.486429 | -0.574345 |
| O           | 0.000000  | 1.745791  | 2.553664  | 0.000000  | 1.721669  | 2.510163  |
| O           | 2.218804  | 3.249540  | -0.760021 | 2.189424  | 3.262515  | -0.690636 |
| O           | -2.218804 | 3.249540  | -0.760021 | -2.189424 | 3.262515  | -0.690636 |
| O           | 0.000000  | -1.745791 | 2.553664  | 0.000000  | -1.721669 | 2.510163  |
| O           | -2.218804 | -3.249540 | -0.760021 | -2.189424 | -3.262515 | -0.690636 |
| O           | 2.218804  | -3.249540 | -0.760021 | 2.189424  | -3.262515 | -0.690636 |

**Table S32.** Atomic coordinates of the optimized structure **26-4**.

| <b>26-4</b> | B3LYP     |           |           | BP86      |           |           |
|-------------|-----------|-----------|-----------|-----------|-----------|-----------|
|             | X         | Y         | Z         | X         | Y         | Z         |
| Mn          | -1.354000 | -0.027207 | -0.479698 | -1.332581 | -0.013717 | -0.467937 |
| Mn          | 0.948590  | 0.082707  | 0.019967  | 0.904944  | 0.157816  | 0.017739  |
| H           | -0.029886 | 0.641061  | -1.317119 | -0.079145 | 0.831099  | -1.262089 |
| H           | -0.568276 | 0.292731  | 0.903957  | -0.648238 | 0.388379  | 0.910514  |
| C           | -2.727520 | -0.663535 | 0.557798  | -2.570652 | -0.813689 | 0.577869  |
| C           | -2.024354 | 1.725356  | -0.406397 | -2.283808 | 1.572325  | -0.416156 |
| C           | -0.694306 | -1.763436 | -0.670674 | -0.466155 | -1.657815 | -0.687065 |
| C           | 1.731350  | -0.693479 | 1.474606  | 1.689583  | -0.633858 | 1.431190  |
| C           | 1.696608  | 1.675824  | 0.388777  | 1.715829  | 1.694270  | 0.399459  |
| C           | 2.320392  | -0.359383 | -1.094044 | 2.263685  | -0.285609 | -1.062352 |
| O           | -2.394504 | 2.812778  | -0.332591 | -2.863256 | 2.582903  | -0.349943 |
| O           | -0.440401 | -2.879735 | -0.845207 | -0.182597 | -2.772180 | -0.927936 |
| O           | -3.539269 | -1.053335 | 1.285164  | -3.313682 | -1.316476 | 1.335369  |
| O           | 2.128078  | 2.727186  | 0.617223  | 2.214913  | 2.729222  | 0.646110  |
| O           | 2.196536  | -1.192991 | 2.410060  | 2.179994  | -1.152836 | 2.363570  |
| O           | 3.164607  | -0.645074 | -1.833894 | 3.130556  | -0.580094 | -1.798561 |

**Table S33.** Atomic coordinates of the optimized structure **26-5T**.

| 26-5T | B3LYP     |           |           | BP86      |           |           |
|-------|-----------|-----------|-----------|-----------|-----------|-----------|
|       | X         | Y         | Z         | X         | Y         | Z         |
| Mn    | 0.000012  | 1.004542  | 0.000000  | 0.520611  | -0.821667 | 0.000000  |
| Mn    | 0.000076  | -1.516550 | 0.000000  | -0.426635 | 1.363952  | 0.000000  |
| C     | 1.855027  | 0.882060  | 0.000000  | -1.341468 | -0.773767 | 0.000000  |
| C     | 0.000054  | -2.674590 | 1.467396  | -0.995360 | 2.377363  | 1.426398  |
| C     | -1.854976 | 0.881669  | 0.000000  | 2.360440  | -0.725916 | 0.000000  |
| C     | -0.000122 | 2.249176  | 1.353495  | 0.535231  | -2.041229 | 1.348808  |
| C     | -0.000122 | 2.249176  | -1.353495 | 0.535231  | -2.041229 | -1.348808 |
| C     | 0.000054  | -2.674590 | -1.467396 | -0.995360 | 2.377363  | -1.426398 |
| O     | 3.005688  | 0.794843  | 0.000000  | -2.510525 | -0.900256 | 0.000000  |
| O     | 0.000043  | -3.313772 | 2.432112  | -1.302374 | 2.976887  | 2.386714  |
| O     | -0.000204 | 3.003984  | 2.228809  | 0.535231  | -2.797098 | 2.242826  |
| O     | -3.005621 | 0.794232  | 0.000000  | 3.525181  | -0.653646 | 0.000000  |
| O     | -0.000204 | 3.003984  | -2.228809 | 0.535231  | -2.797098 | -2.242826 |
| O     | 0.000043  | -3.313772 | -2.432112 | -1.302374 | 2.976887  | -2.386714 |
| H     | 0.000179  | -0.216593 | -1.171274 | 0.607689  | 0.480980  | -1.089859 |
| H     | 0.000179  | -0.216593 | 1.171274  | 0.607689  | 0.480980  | 1.089859  |

**Table S34.** Atomic coordinates of the optimized structure **26-6T**.

| 26-6T | B3LYP     |           |           | BP86      |           |           |
|-------|-----------|-----------|-----------|-----------|-----------|-----------|
|       | X         | Y         | Z         | X         | Y         | Z         |
| Mn    | 0.672077  | 1.219344  | 0.000000  | 0.673850  | 1.159899  | 0.000000  |
| Mn    | -0.520798 | -0.924743 | 0.000000  | -0.664149 | -0.742499 | 0.000000  |
| H     | -0.292238 | 0.319496  | 1.146028  | -0.493769 | 0.559966  | 1.105411  |
| H     | -0.292238 | 0.319496  | -1.146028 | -0.493769 | 0.559966  | -1.105411 |
| C     | 2.075733  | 2.559543  | 0.000000  | 2.379301  | 1.999067  | 0.000000  |
| C     | -0.726507 | 2.474723  | 0.000000  | -0.242884 | 2.761533  | 0.000000  |
| C     | 1.984650  | -0.111852 | 0.000000  | 1.645350  | -0.463171 | 0.000000  |
| C     | -0.533659 | -2.156703 | -1.349575 | -0.675480 | -1.969816 | -1.325090 |
| C     | -2.309962 | -0.813108 | 0.000000  | -2.441808 | -0.704657 | 0.000000  |
| C     | -0.533659 | -2.156703 | 1.349575  | -0.675480 | -1.969816 | 1.325090  |
| O     | -1.616876 | 3.205594  | 0.000000  | -0.867540 | 3.748517  | 0.000000  |
| O     | 2.859264  | -0.871668 | 0.000000  | 2.493159  | -1.277460 | 0.000000  |
| O     | 2.920860  | 3.339455  | 0.000000  | 3.441383  | 2.480465  | 0.000000  |
| O     | -3.463066 | -0.685672 | 0.000000  | -3.614665 | -0.630194 | 0.000000  |
| O     | -0.533659 | -2.917568 | -2.223155 | -0.675480 | -2.752776 | -2.199585 |
| O     | -0.533659 | -2.917568 | 2.223155  | -0.675480 | -2.752776 | 2.199585  |

**Table S35.** Atomic coordinates of the optimized structure **26-7T**.

| 26-7T | B3LYP     |           |           | BP86      |           |           |
|-------|-----------|-----------|-----------|-----------|-----------|-----------|
|       | X         | Y         | Z         | X         | Y         | Z         |
| Mn    | 0.000000  | 1.173779  | -0.392860 | 0.000000  | 1.175486  | -0.410387 |
| Mn    | 0.000000  | -1.173779 | -0.392860 | 0.000000  | -1.175486 | -0.410387 |
| H     | 1.138627  | 0.000000  | -0.847896 | 1.132518  | 0.000000  | -0.891749 |
| H     | -1.138627 | 0.000000  | -0.847896 | -1.132518 | 0.000000  | -0.891749 |
| C     | -1.427172 | 2.351840  | -0.583703 | -1.397856 | 2.346831  | -0.565217 |
| C     | 0.000000  | 1.413183  | 1.428527  | 0.000000  | 1.419465  | 1.384035  |
| C     | 1.427172  | 2.351840  | -0.583703 | 1.397856  | 2.346831  | -0.565217 |
| C     | -1.427172 | -2.351840 | -0.583703 | -1.397856 | -2.346831 | -0.565217 |
| C     | 0.000000  | -1.413183 | 1.428527  | 0.000000  | -1.419465 | 1.384035  |
| C     | 1.427172  | -2.351840 | -0.583703 | 1.397856  | -2.346831 | -0.565217 |
| O     | 0.000000  | 1.649828  | 2.562051  | 0.000000  | 1.665347  | 2.530976  |
| O     | 2.356872  | 3.024099  | -0.712108 | 2.332658  | 3.045479  | -0.663624 |
| O     | -2.356872 | 3.024099  | -0.712108 | -2.332658 | 3.045479  | -0.663624 |
| O     | 0.000000  | -1.649828 | 2.562051  | 0.000000  | -1.665347 | 2.530976  |
| O     | -2.356872 | -3.024099 | -0.712108 | -2.332658 | -3.045479 | -0.663624 |
| O     | 2.356872  | -3.024099 | -0.712108 | 2.332658  | -3.045479 | -0.663624 |

**Complete Gaussian 03 reference (Reference 40)**

Frisch, M. J.; Trucks, G. W.; Schlegel, H. B.; Scuseria, G. E.; Robb, M. A.; Cheeseman, J. R.; Montgomery, Jr., J. A.; Vreven, T.; Kudin, K. N.; Burant, J. C.; Millam, J. M.; Iyengar, S. S.; Tomasi, J.; Barone, V.; Mennucci, B.; Cossi, M.; Scalmani, G.; Rega, N.; Petersson, G. A.; Nakatsuji, H.; Hada, M.; Ehara, M.; Toyota, K.; Fukuda, R.; Hasegawa, J.; Ishida, M.; Nakajima, T.; Honda, Y.; Kitao, O.; Nakai, H.; Klene, M.; Li, X.; Knox, J. E.; Hratchian, H. P.; Cross, J. B.; Bakken, V.; Adamo, C.; Jaramillo, J.; Gomperts, R.; Stratmann, R. E.; Yazyev, O.; Austin, A. J.; Cammi, R.; Pomelli, C.; Ochterski, J. W.; Ayala, P. Y.; Morokuma, K.; Voth, G. A.; Salvador, P.; Dannenberg, J. J.; Zakrzewski, V. G.; Dapprich, S.; Daniels, A. D.; Strain, M. C.; Farkas, O.; Malick, D. K.; Rabuck, A. D.; Raghavachari, K.; Foresman, J. B.; Ortiz, J. V.; Cui, Q.; Baboul, A. G.; Clifford, S.; Cioslowski, J.; Stefanov, B. B.; Liu, G.; Liashenko, A.; Piskorz, P.; Komaromi, I.; Martin, R. L.; Fox, D. J.; Keith, T.; Al-Laham, M. A.; Peng, C. Y.; Nanayakkara, A.; Challacombe, M.; Gill, P. M. W.; Johnson, B.; Chen, W.; Wong, M. W.; Gonzalez, C.; and Pople, J. A. Gaussian 03, Revision C.02; Gaussian, Inc., Wallingford CT, **2004**.
